# Supplementary material
Source: Springer Nature journal article supplement (https://publikationen.ub.uni-frankfurt.de/opus4/files/35269/13104_2014_3224_MOESM6_ESM.pdf)
Supplement: MOESM6 [file 13104_2014_3224_MOESM6_ESM.pdf]

**Suppl. Table 5.** Drug concentrations that decrease the viability of V600E BRAF-mutated melanoma cells by 50% (IC<sub>50</sub>).

| Cell line                                           | IC <sub>50</sub> PLX4032<br>( $\mu$ M) |
|-----------------------------------------------------|----------------------------------------|
| Colo-679                                            | 0.17 $\pm$ 0.03                        |
| Colo-679 <sup>r</sup> PLX4032 <sup>10</sup> $\mu$ M | 16.51 $\pm$ 1.31                       |
| IGR-39                                              | 0.23 $\pm$ 0.04                        |
| IGR-39 <sup>r</sup> PLX4032 <sup>20</sup>           | 9.94 $\pm$ 1.51                        |
| MelHO                                               | 0.13 $\pm$ 0.05                        |
| MelHO <sup>r</sup> PLX4032 <sup>10</sup> $\mu$ M    | 37.86 $\pm$ 2.82                       |
| RVH-421                                             | 0.10 $\pm$ 0.01                        |
| RVH-421 <sup>r</sup> PLX4032 <sup>10</sup> $\mu$ M  | 14.61 $\pm$ 1.50                       |

  

|                                                     | PLX4720<br>( $\mu$ M) |
|-----------------------------------------------------|-----------------------|
| Colo-679                                            | 0.26 $\pm$ 0.07       |
| Colo-679 <sup>r</sup> PLX4720 <sup>10</sup> $\mu$ M | 30.01 $\pm$ 1.95      |
| IGR-39                                              | 0.41 $\pm$ 0.06       |
| IGR-39 <sup>r</sup> PLX4720 <sup>20</sup> $\mu$ M   | 23.93 $\pm$ 0.54      |
| MelHO                                               | 0.21 $\pm$ 0.03       |
| MelHO <sup>r</sup> PLX4720 <sup>10</sup> $\mu$ M    | 24.53 $\pm$ 7.35      |
| RVH-421                                             | 0.05 $\pm$ 0.04       |
| RVH-421 <sup>r</sup> PLX4720 <sup>10</sup> $\mu$ M  | 37.71 $\pm$ 4.69      |

---

|                                         | IC <sub>50</sub> vincristine<br>(ng/mL) |
|-----------------------------------------|-----------------------------------------|
| Colo-679                                | 3.57 ± 0.38                             |
| Colo-679 <sup>r</sup> VCR <sup>20</sup> | 80.59 ± 8.67                            |
| IGR-39                                  | 1.54 ± 0.10                             |
| IGR-39 <sup>r</sup> VCR <sup>10</sup>   | 8.95 ± 2.23                             |
| MelHO                                   | 0.95 ± 0.09                             |
| MelHO <sup>r</sup> VCR <sup>20</sup>    | 95.77 ± 53.03                           |

---

|                                          | IC <sub>50</sub> mitoxantrone<br>(ng/mL) |
|------------------------------------------|------------------------------------------|
| RVH-421                                  | 4.81 ± 0.53                              |
| RVH-421 <sup>r</sup> Mitox <sup>10</sup> | 24.97 ± 4.82                             |

---
